# Supplementary material for: Genomic analysis of P elements in natural populations of Drosophila melanogaster
Source: PubMed Central journal article supplement (PMC5602686; doi:10.7717/peerj.3824), 2017-09-15

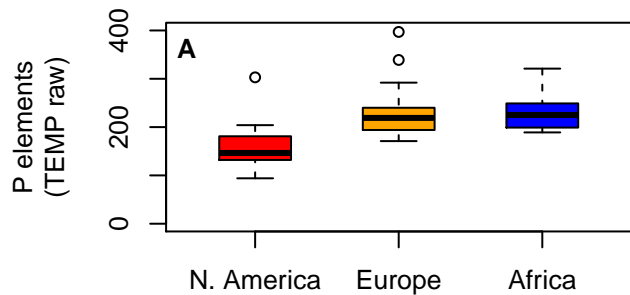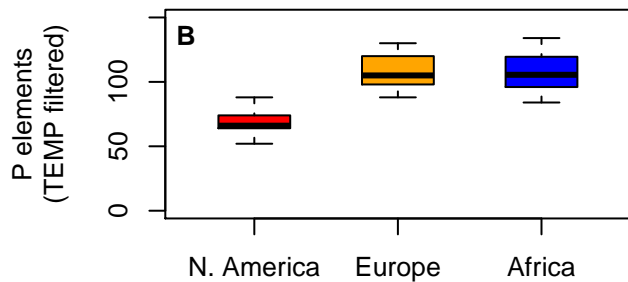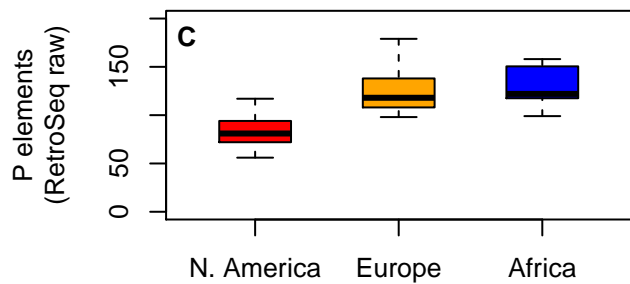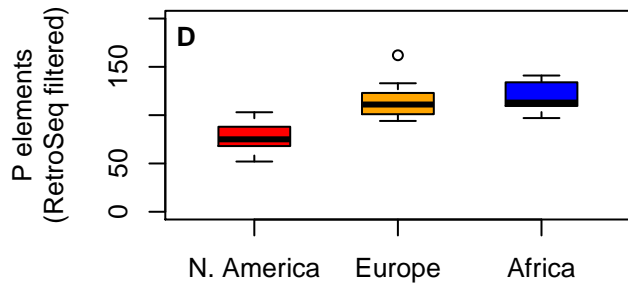

Supplement: peerj-05-3824-s004.pdf [file peerj-05-3824-s004.pdf]
