# Supplementary material for: Genomic analysis of P elements in natural populations of Drosophila melanogaster
Source: PubMed Central journal article supplement (PMC5602686; doi:10.7717/peerj.3824), 2017-09-15

**A. P-M cytotyping status**

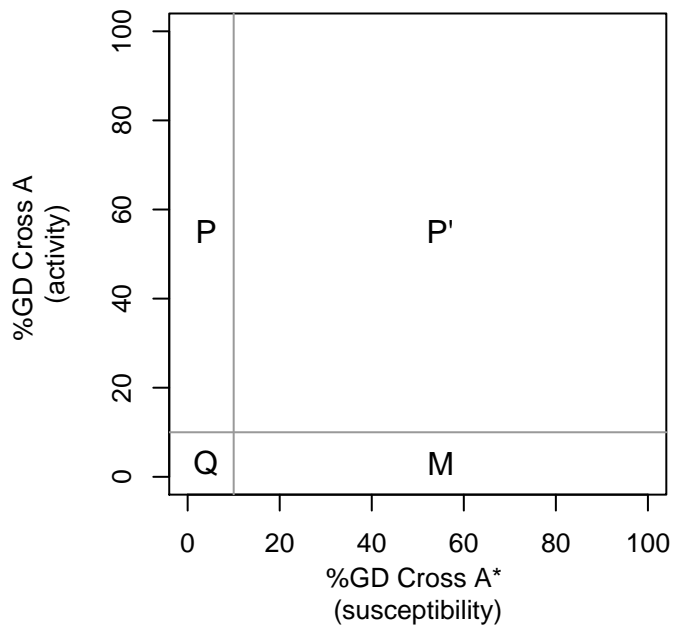

**B. N. America (Athens, Georgia, USA)**

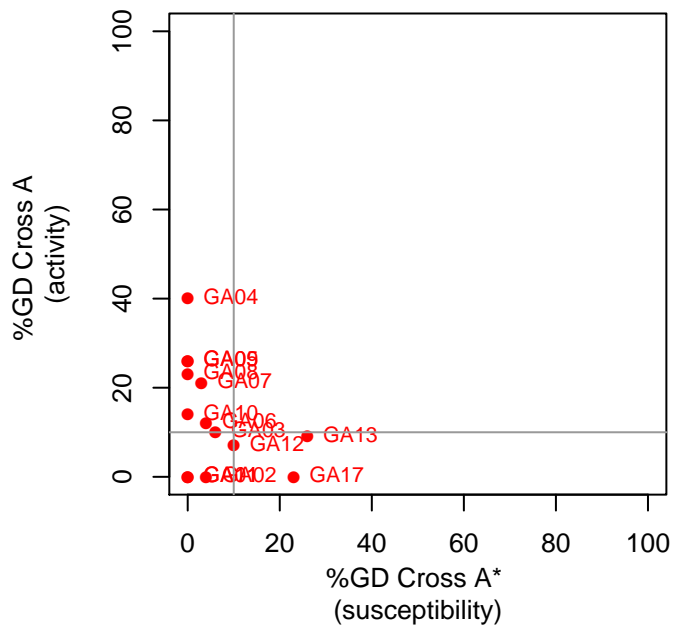

**C. Europe (Montpellier, France)**

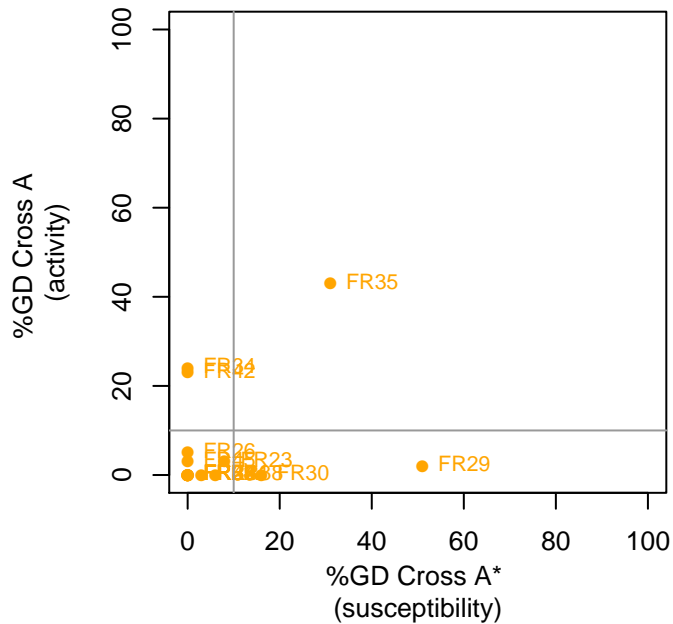

**D. Africa (Accra, Ghana)**

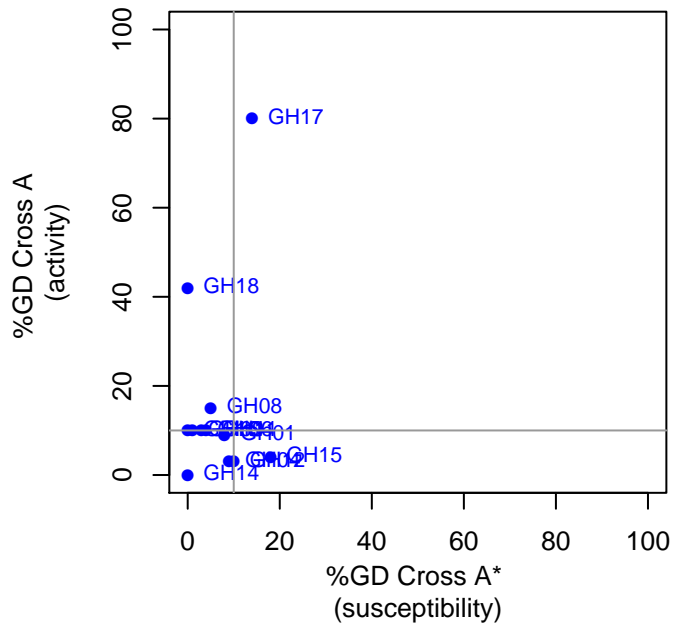

Supplement: peerj-05-3824-s005.pdf [file peerj-05-3824-s005.pdf]
